# Supplementary material for: Optimization of enzymatic hydrolysis of cellulosic fraction obtained from stranded driftwood feedstocks for lipid production by Solicoccozyma terricola
Source: PubMed Central journal article supplement — Biotechnol Rep (Amst). 2019 Aug 7;24:e00367. doi: 10.1016/j.btre.2019.e00367 (PMC6704348; doi:10.1016/j.btre.2019.e00367), 2019-08-07
Supplement: mmc1.pdf [file mmc1.pdf]

## SUPPLEMENTARY MATERIALS

### Optimization of enzymatic hydrolysis of cellulosic fraction obtained from stranded driftwood feedstocks for lipid production by *Solicoccozyma terricola*.

Giorgia Tasselli, Sara Filippucci, Silvia D'Antonio, Gianluca Cavalaglio, Benedetta Turchetti, Franco Cotana and Pietro Buzzini

| Runs | A                 |      |            |           | B                  | C                          |                                | D                          |                                |
|------|-------------------|------|------------|-----------|--------------------|----------------------------|--------------------------------|----------------------------|--------------------------------|
|      | Temperature of SE |      | Time of SE |           | Log R <sub>0</sub> | WIS Cellulose recovery (%) | WIS Hemicellulose recovery (%) | HLF Cellulose recovery (%) | HLF Hemicellulose recovery (%) |
|      | Level             | (°C) | Level      | (minutes) |                    |                            |                                |                            |                                |
| SE01 | 0                 | 190  | 0          | 25        | 4.05               | 99.60                      | 20.53                          | 43.22                      | 82.63                          |
| SE02 | 0                 | 190  | 0          | 25        | 4.05               | 99.61                      | 18.69                          | 46.80                      | 92.27                          |
| SE03 | 0                 | 190  | +1         | 40        | 4.25               | 99.48                      | 13.22                          | 46.42                      | 100.00                         |
| SE04 | -1                | 170  | +1         | 40        | 3.66               | 99.73                      | 70.82                          | 14.02                      | 36.85                          |
| SE05 | +1                | 210  | +1         | 40        | 4.84               | 99.40                      | 8.26                           | 77.52                      | 100.00                         |
| SE06 | +1                | 210  | -1         | 10        | 4.24               | 99.54                      | 13.94                          | 76.02                      | 100.00                         |
| SE07 | 0                 | 190  | -1         | 10        | 3.65               | 99.79                      | 66.79                          | 30.84                      | 40.96                          |
| SE08 | -1                | 170  | 0          | 25        | 3.46               | 99.83                      | 86.26                          | 10.06                      | 29.60                          |
| SE09 | 0                 | 190  | 0          | 25        | 4.05               | 99.61                      | 19.36                          | 50.07                      | 84.17                          |
| SE10 | 0                 | 190  | 0          | 25        | 4.05               | 99.56                      | 20.88                          | 42.60                      | 100.00                         |
| SE11 | 0                 | 190  | 0          | 25        | 4.05               | 99.63                      | 29.95                          | 47.80                      | 54.77                          |
| SE12 | +1                | 210  | 0          | 25        | 4.64               | 99.56                      | 3.82                           | 85.30                      | 100.00                         |
| SE13 | -1                | 170  | -1         | 10        | 3.06               | 99.93                      | 94.70                          | 7.16                       | 10.81                          |

**Table S1.** A = experimental design runs (SE01-SES13) for steam explosion (SE) tests of stranded driftwood (SD) feedstocks: temperature of SE (°C) and time of SE (minutes); B = severity factor (Log R<sub>0</sub>) of steam explosion (SE01-SE13) that summarize the combined effect of both temperature and time; C= Cellulose recovery in the water insoluble substrate (WIS) after SE [(g of WIS cellulose/g of SD cellulose) x 100], Hemicellulose recovery in the water insoluble substrate (WIS) after SE [(g of WIS hemicellulose/g of SD hemicellulose) x 100]; D= Cellulose

recovery in the hydrolyzed liquid fraction (HLF) [(g of HLF glucose/g of WIS cellulose) x 100], Hemicellulose recovery in the hydrolyzed liquid fraction (HLF) [(g of HLF xylose and galactose /g of WIS hemicellulose) x 100].

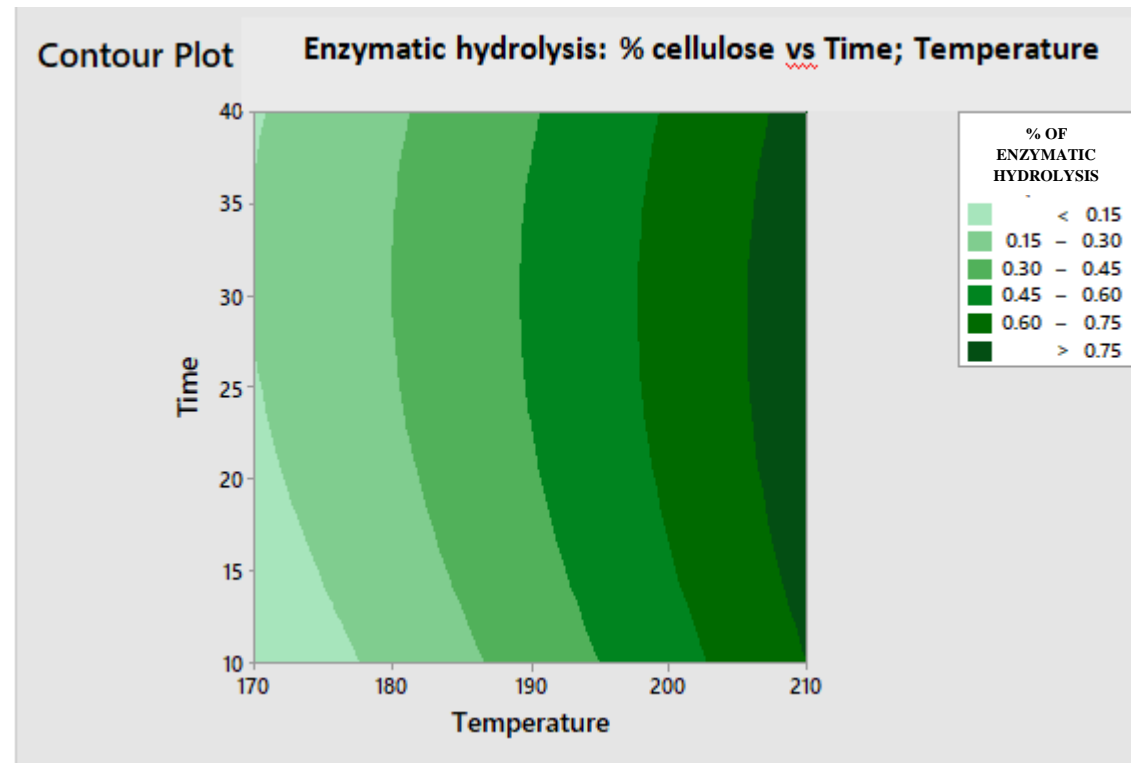

**Fig. S1.** Graphical response of the dependent variable (% of enzymatic hydrolysis) as a function of the two independent variables [temperature of SE (°C) and time of SE (minutes)].

---

**Composition of stranded driftwood  
before pretreatment (%)**

---

|                         |              |
|-------------------------|--------------|
| <b>Cellulose</b>        | 31.43 ± 0.62 |
| <b>Hemicellulose</b>    | 14.91 ± 0.21 |
| Xylan                   | 12.11 ± 0.11 |
| Mannan                  | 1.17 ± 0.14  |
| Galactan                | 0.58 ± 0.25  |
| Arabinian               | 1.05 ± 0.21  |
| <b>Lignin</b>           | 27.80 ± 1.73 |
| <b>Acetyl groups</b>    | 4.27 ± 0.11  |
| <b>Extractives</b>      | 6.19 ± 0.22  |
| <b>Ashes</b>            | 4.86 ± 0.48  |
| <b>Other components</b> | 10.58 ± 0.32 |

---

**Composition of water insoluble substrate (WIS) after steam explosion (%)**

---

|                         |              |
|-------------------------|--------------|
| <b>Cellulose</b>        | 44.52 ± 1.01 |
| <b>Hemicellulose</b>    | 0.31 ± 0     |
| <b>Lignin</b>           | 48.45 ± 0.33 |
| <b>Acetyl groups</b>    | 0.78 ± 0.12  |
| <b>Ashes</b>            | 0.52 ± 0.11  |
| <b>Other components</b> | 5.42 ± 0.36  |

---

**Table S2.** Composition of stranded driftwood feedstocks (SD) before steam explosion and composition of water insoluble substrate (WIS) after steam explosion.
